# Supplementary material for: Coupling between the North Atlantic subpolar gyre vigor and forest fire activity in northern Scandinavia
Source: Copernicus journal article supplement (doi:10.5194/cp-2019-123), 2019-10-14
Supplement: Supplementary file 1 [file cp-2019-123-supplement.pdf]

# Supporting Information for "Coupling between the North Atlantic subpolar gyre vigour and forest fire activity in northern Scandinavia"

Tine Nilsen<sup>1,2</sup>, Dmitry V. Divine<sup>3,1</sup>, Annika Hofgaard<sup>4</sup>, Andreas Born<sup>5,6</sup>, Johann Jungclaus<sup>7</sup>, and Igor Drobyshev<sup>8,9</sup>

<sup>1</sup>Department of Mathematics and Statistics, UiT - The Arctic University of Norway, 9037 Tromsø, Norway

<sup>2</sup>Department of Geography, Justus-Liebig University of Giessen, 35390 Giessen, Germany

<sup>3</sup>Norwegian Polar Institute, Fram Centre, 9296 Tromsø, Norway

<sup>4</sup>Norwegian Institute for Nature Research, 7485 Trondheim, Norway

<sup>5</sup>Department of Earth Science, University of Bergen, 5020 Bergen, Norway

<sup>6</sup>Bjerknes Centre for Climate Research, Bergen, 5020 Bergen, Norway

<sup>7</sup>Max Planck Institute for Meteorology, 20146 Hamburg, Germany

<sup>8</sup>Southern Swedish Forest Research Centre, Swedish University of Agricultural Sciences, 230 53 Alnarp, Sweden

<sup>9</sup>Chaire industrielle CRSNG-UQAT-UQAM en aménagement forestier durable, Université du Québec en Abitibi-Témiscamingue (UQAT), J9X 5E4 Québec, Canada

**Correspondence:** Tine Nilsen, [tine.nilsen@uit.no](mailto:tine.nilsen@uit.no)

## Contents of this file

1. Figures S1-S3 supplementary figures.

### 1 Supplementary figures

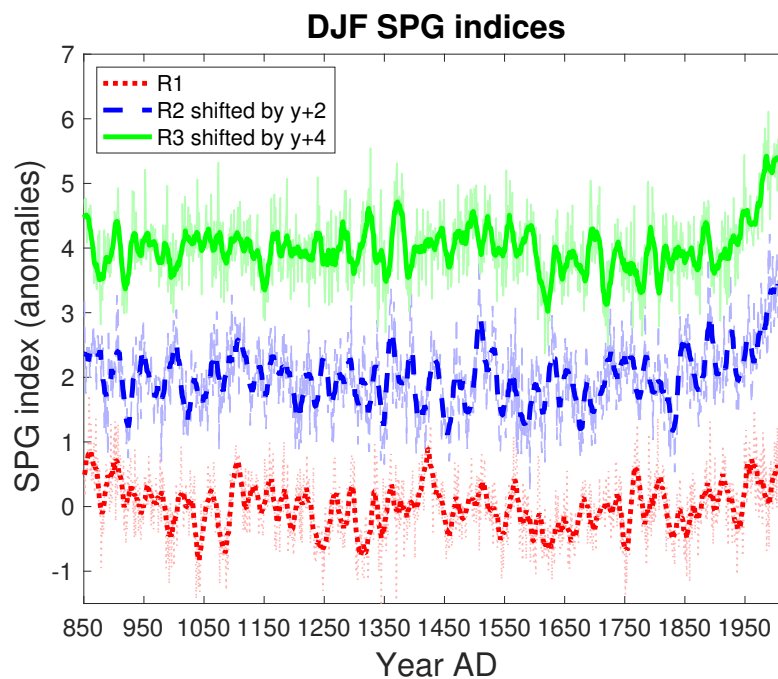

**Figure S1.** DJF subpolar gyre (SPG) indices for model simulations R1-R3, (anomalies). Annual values are plotted with thin lines, the thicker lines are smoothed using an 11-year running mean filter only for visualization purposes. R1 is plotted with red, dotted line. R2 shifted by +2 in the y-direction, plotted with blue, dashed line. R3 is shifted by +4 in the y-direction, plotted with green, solid line.

### Streamfunction anomalies preceding and during MDC-based summer drought

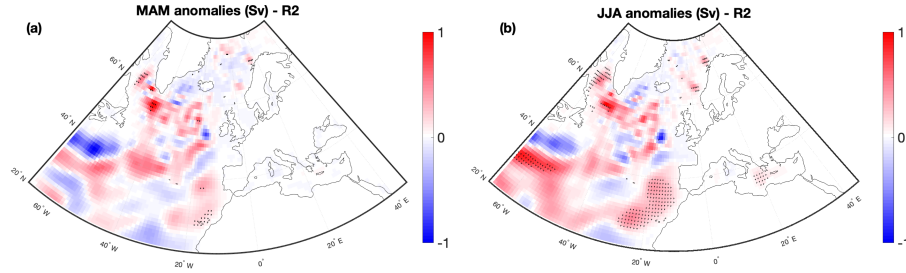

**Figure S2.** R2 streamfunction composite anomalies for spring (March, April, May: MAM) and summer (June, July, August: JJA). Significant anomalies are indicated by black stippling.

### GPH anomalies preceding MDC-based summer drought

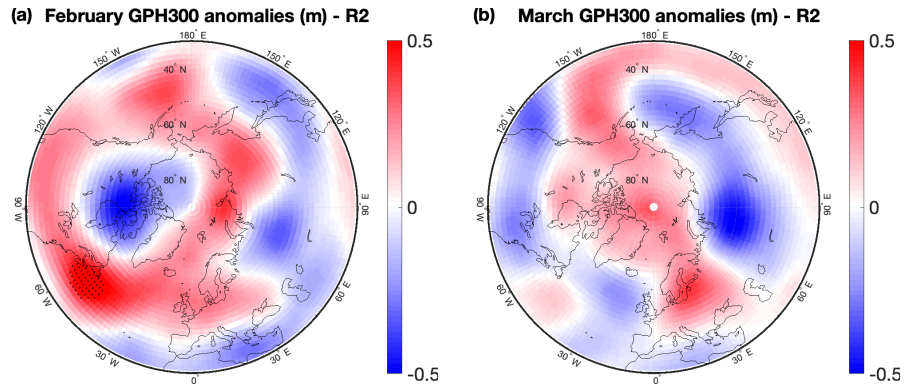

**Figure S3.** R2 monthly composite anomalies in 300 hPa geopotential height for February and March. Significant anomalies are indicated by black stippling.
